# Supplementary material
Source: PubMed Central journal article supplement (PMC5490500)
Supplement: NIHMS865100-supplement-Supp_info.pdf [file NIHMS865100-supplement-Supp_info.pdf]

# Supporting Web Materials to “Weighted win loss approach for analyzing prioritized outcomes”<sup>†</sup>

Xiaodong Luo<sup>a\*</sup> Junshan Qiu<sup>b</sup>, Steven Bai<sup>b</sup> and Hong Tian<sup>c</sup>

## 1. Proof of $W_D(G_1, G_2) = W_D(g_1, g_2) + o_p(n^{3/2})$

For  $i, j = 1, \dots, n$ , let  $G_{2ij} = G_2(Y_{2i} \wedge Y_{2j})$ ,  $g_{2ij} = g_2(Y_{2i} \wedge Y_{2j})$ ,  $G_{1ij} = G_1(Y_{1i} \wedge Y_{1j}, Y_{2i} \wedge Y_{2j})$  and  $g_{1ij} = g_1(Y_{1i} \wedge Y_{1j}, Y_{2i} \wedge Y_{2j})$ . We can write  $W_D(G_1, G_2) = W_D(g_1, g_2) + SR_1 + SR_2$ , where  $SR_1 = SR_{12} + SR_{11}$  and  $SR_2 = SR_{21} + SR_{22}$

$$\begin{aligned} SR_{12} &= - \sum_{i=1}^n \sum_{j=1}^n Z_i(1 - Z_j)(W_{2ij} - L_{2ij}) \frac{G_{2ij} - g_{2ij}}{g_{2ij}^2}, \\ SR_{11} &= - \sum_{i=1}^n \sum_{j=1}^n Z_i(1 - Z_j) \Omega_{2ij} (W_{1ij} - L_{1ij}) \frac{G_{1ij} - g_{1ij}}{g_{1ij}^2}, \\ SR_{22} &= \sum_{i=1}^n \sum_{j=1}^n Z_i(1 - Z_j)(W_{2ij} - L_{2ij}) \frac{(G_{2ij} - g_{2ij})^2}{G_{2ij} g_{2ij}^2}, \\ SR_{21} &= - \sum_{i=1}^n \sum_{j=1}^n Z_i(1 - Z_j) \Omega_{2ij} (W_{1ij} - L_{1ij}) \frac{(G_{1ij} - g_{1ij})^2}{G_{1ij} g_{1ij}^2}. \end{aligned}$$

By Conditions 1 and 2,  $\inf_{i,j} \min\{G_{2ij}, g_{2ij}, G_{1ij}, g_{1ij}\}$  is bounded away from zero and that  $\sup_{i,j} |G_{2ij} - g_{2ij}| = o(n^{-1/4})$  and  $\sup_{i,j} |G_{1ij} - g_{1ij}| = o(n^{-1/4})$  almost surely, therefore, the remainders  $SR_{22} = o(n^{3/2})$  and  $SR_{21} = o(n^{3/2})$  almost surely. Next we shall show  $SR_{12} = o_p(n^{3/2})$  and  $SR_{11} = o_p(n^{3/2})$ . We shall only show the case for  $SR_{11}$  because the case for  $SR_{12}$  can be similarly proved. Let  $V_{1kij} = V_{1k}(Y_{1i} \wedge Y_{1j}, Y_{2i} \wedge Y_{2j})$ , Condition 1 indicates that  $SR_{11} = \widetilde{SR}_{11} + o(n^{3/2})$  almost surely, where

$$\widetilde{SR}_{11} = - \sum_{i=1}^n \sum_{j=1}^n Z_i(1 - Z_j) \Omega_{2ij} (W_{1ij} - L_{1ij}) \frac{n^{-1} \sum_{k=1}^n V_{1kij}}{g_{1ij}^2}.$$

<sup>a</sup>Research and Development, Sanofi US

<sup>b</sup>Division of Biometrics I, Office of Biostatistics, Center for Drug Evaluation and Research, US Food and Drug Administration

<sup>c</sup>Janssen Research and Development

\* Correspondence to: Department of Biostatistics and Programming, Research and Development, Sanofi US, Bridgewater, New Jersey, U.S.A., 08807. E-mail: xiaodong.luo@sanofi.com

<sup>†</sup>DISCLAIMER: This paper reflects the views of the authors and should not be construed to represent FDA's views or policies.

Apparently,  $\widetilde{SR}_{11}$  is a U-statistic of order 3. We denote the summand in  $\widetilde{SR}_{11}$  as  $X_{ijk}$ ,  $i, j, k = 1, \dots, n$ . For mutually different  $i, j, k$ , by the conditions on  $V_{1k}(y_1, y_2)$ ,  $E(X_{ijk} | O_i) = E\{E(X_{ijk} | O_i, O_j)\} = 0$  and  $E(X_{ijk} | O_j) = E\{E(X_{ijk} | O_i, O_j)\} = 0$ . And, under  $H_0$ , because  $V_{1kij}$  is symmetric in  $i$  and  $j$ , a similar calculation like the proof of the formula (3) in the Appendix of the main body will show that  $E(X_{ijk} | O_k) = 0$ . Therefore, the U-statistic  $\widetilde{SR}_{11}$  is degenerate with  $\text{var}\{\widetilde{SR}_{11}\} = o(n^3)$ , which, by Chebyshev's inequality, implies  $\widetilde{SR}_{11} = o_p(n^{3/2})$  as desired.

## 2. Proof of Eq. (5) the approximation for $n^{-1}W_D(g_1, g_2)$

Using the notations in Section 1 of this supporting web materials, we can denote the summand of the U-statistic  $n^{-1}W_D(g_1, g_2)$  as  $Q_{ij}$ ,  $i, j = 1, \dots, n$ , where

$$Q_{ij} = Z_i(1 - Z_j) \left\{ \frac{W_{2ij} - L_{2ij}}{g_{2ij}} + \frac{\Omega_{2ij}(W_{1ij} - L_{1ij})}{g_{1ij}} \right\}.$$

Because  $Q_{ij}$ ,  $i, j = 1, \dots, n$  are bounded with mean zero under  $H_0$ , using the exponential inequalities for U-statistics [1, 2], we can show that

$$n^{-1}W_D(g_1, g_2) = \sum_{i=1}^n E(Q_{ij} | O_i) + \sum_{j=1}^n E(Q_{ij} | O_j) + o(n^{1/2})$$

almost surely. Note the main terms on the right hand side are the Hajek's projection [3] of the U-statistic  $n^{-1}W_D(g_1, g_2)$ . Switching  $i$  and  $j$  in the second term and then combining it with the first term, we get  $\sum_{i=1}^n E(Q_{ij} + Q_{ji} | O_i)$ . By definition, for any  $i, j = 1, \dots, n$  and  $k = 1, 2$ ,  $W_{kji} = L_{kij}$ ,  $\Omega_{2ij} = \Omega_{2ji}$ ,  $g_{2ij} = g_{2ji}$  and  $g_{1ij} = g_{1ji}$ , therefore  $Z_i(1 - Z_j)(W_{2ij} - L_{2ij}) + Z_j(1 - Z_i)(W_{2ji} - L_{2ji}) = (Z_i - Z_j)(W_{2ij} - L_{2ij})$  and  $Z_i(1 - Z_j)\Omega_{2ij}(W_{1ij} - L_{1ij}) + Z_j(1 - Z_i)\Omega_{2ij}(W_{1ji} - L_{1ji}) = (Z_i - Z_j)\Omega_{2ij}(W_{1ij} - L_{1ij})$ . With these, we find

$$Q_{ij} + Q_{ji} = (Z_i - Z_j) \left\{ \frac{W_{2ij} - L_{2ij}}{g_{2ij}} + \frac{\Omega_{2ij}(W_{1ij} - L_{1ij})}{g_{1ij}} \right\},$$

which completes the proof.

## 3. Optimality of $W_D(g_1, g_2)$ under contiguous alternatives

For simplicity, we further assume that the study ends at a time point  $\tau$  such that subjects survive at  $\tau$  will be censored and the cumulative hazards  $\Lambda_{c1}$  and  $\Lambda_{c0}$  are continuous in  $(0, \tau)$  with only a jump at  $\tau$ . Let  $\mu_2(dt_2) = \{r_{20}(t_2)r_{21}(t_2)/r_2(t_2)\}\lambda_2(t_2)dt_2$  and  $\mu_1(dt_1, dt_2) = \{r_{10}(t_1, t_2)r_{11}(t_1, t_2)/r_1(t_1, t_2)\}\lambda_1(t_1 | t_2)dt_1\Lambda_a(dt_2)$ .

Under a sequence of contiguous alternatives:  $\lambda_2^{(n)}(t_2) = \{1 - n^{-1/2}\Theta_{2n}(t_2)\}\lambda_2(t_2)$  and  $\lambda_1^{(n)}(t_1 | t_2) = \{1 - n^{-1/2}\Theta_{1n}(t_1, t_2)\}\lambda_1(t_1 | t_2)$  such that  $\Theta_{2n}(t_2) \rightarrow \theta_2(t_2)$  and  $\Theta_{1n}(t_1, t_2) \rightarrow \theta_1(t_1, t_2)$  with  $\theta_2 \geq 0$  and  $\theta_1 \geq 0$ , we calculate

$$\begin{aligned} n^{-3/2}E\{W_D(g_1, g_2)\} &= \int_{t_2 \leq \tau} \frac{r_2(t_2)\theta_2(t_2)}{g_2(t_2)} \mu_2(dt_2) + \int_{t_1 \leq t_2 \leq \tau} \frac{r_1(t_1, t_2)\theta_1(t_1, t_2)}{g_1(t_1, t_2)} \mu_1(dt_1, dt_2) + o(1) \\ &= \int_{0 \leq t_1 \leq t_2 \leq \tau} \frac{r(t_1, t_2)\theta(t_1, t_2)}{g(t_1, t_2)} \mu(dt_1, dt_2) + o(1) \end{aligned}$$

where  $r(t_1, t_2) = I(t_1 = 0)r_2(t_2) + I(t_1 > 0)r_1(t_1, t_2)$ ,  $\theta(t_1, t_2) = I(t_1 = 0)\theta_2(t_2) + I(t_1 > 0)\theta_1(t_1, t_2)$ ,  $g(t_1, t_2) = I(t_1 = 0)g_2(t_2) + I(t_1 > 0)g_1(t_1, t_2)$  and  $\mu(dt_1, dt_2) = dI(t_1 \geq 0)\mu_2(dt_2) + \mu_1(dt_1, dt_2)$ .

In the end of this section, we calculate that, under the sequence of contiguous alternatives,

$$\text{var}\{n^{-3/2}W_D(g_1, g_2)\} = \int_{0 \leq t_1 \leq t_2 \leq \tau} \psi(t_1, t_2)\mu(dt_1, dt_2) + o(1), \tag{S1}$$

where  $\psi(t_1, t_2) = I(t_1 = 0)\psi_2(t_2) + I(t_1 > 0)\psi_1(t_1, t_2)$  with  $\psi_2(t_2) = r_2^2(t_2)/g_2^2(t_2)$  and

$$\begin{aligned} \psi_1(t_1, t_2) &= \frac{r_1^2(t_1, t_2)}{g_1^2(t_1, t_2)} \left\{ 1 + \tilde{\Lambda}_c(dt_2) - \frac{\tilde{\Lambda}_c(dt_2)}{\Lambda_a(dt_2)} \right\} \\ &+ 2 \int_{t_1 \leq t'_2 < t_2 \leq \tau} \frac{r_1(t_1, t_2)}{g_1(t_1, t_2)} \frac{r_1(t_1, t'_2)}{g_1(t_1, t'_2)} \tilde{\Lambda}_c(dt'_2) \\ &+ 2 \int_{t'_1 \leq t_1} \frac{r_1(t'_1, t_2)}{g_1(t'_1, t_2)} \lambda_1(t'_1 | t_2) dt'_1 \eta_{g_1}(t_1, t_2) \\ &+ 2I(t_2 < \tau) \frac{r_2(t_2)}{g_2(t_2)} \xi_{g_2}(t_2) \eta_{g_1}(t_1, t_2), \end{aligned}$$

with

$$\begin{aligned} \tilde{\Lambda}_c(dt_2) &= \frac{r_{10}(t_1, t_2)\Lambda_{c0}(dt_2) + r_{11}(t_1, t_2)\Lambda_{c1}(dt_2)}{r_1(t_1, t_2)} = \frac{r_{20}(t_2)\Lambda_{c0}(dt_2) + r_{21}(t_2)\Lambda_{c1}(dt_2)}{r_2(t_2)}, \\ \eta_{g_1}(t_1, t_2) &= \int_{t_1 \leq t'_2 < t_2 \leq \tau} \frac{r_1(t_1, t'_2)}{g_1(t_1, t'_2)} \left\{ \frac{\lambda_1(t_1 | t'_2)}{\lambda_1(t_1 | t_2)} - 1 \right\} \tilde{\Lambda}_c(dt'_2) \end{aligned}$$

and

$$\begin{aligned} \xi_{g_2}(t_2) &= 1 + \frac{2\Lambda_2(dt_2) + g_2(dt_2)/g_2(t_2)}{\Lambda_a(dt_2)} \\ &= \begin{cases} 1 + \frac{2\Lambda_2(dt_2)}{\Lambda_a(dt_2)}, & \text{if } g_2 = 1, \\ 1 + \frac{\Lambda_2(dt_2)}{\Lambda_a(dt_2)} - \frac{\tilde{\Lambda}_c(dt_2)}{\Lambda_a(dt_2)}, & \text{if } g_2 = r_2. \end{cases} \end{aligned}$$

If  $\lambda_1(t_1 | t_2)$  is a nonincreasing function of  $t_2$  for any given  $t_1$ , then  $\eta_{g_1}(t_1, t_2) \geq 0$ , which implies  $\psi_1(t_1, t_2) > 0$ . To maximize the power, one needs to maximize

$$e_{g_1, g_2} = \frac{\int_{0 \leq t_1 \leq t_2 \leq \tau} \frac{r(t_1, t_2)\theta(t_1, t_2)}{g(t_1, t_2)} \mu(dt_1, dt_2)}{\left\{ \int_{0 \leq t_1 \leq t_2 \leq \tau} \psi(t_1, t_2)\mu(dt_1, dt_2) \right\}^{1/2}}.$$

We can apply the Cauchy-Schwartz inequality to get

$$e_{g_1, g_2}^2 \leq \int_{0 \leq t_1 \leq t_2 \leq \tau} \frac{r^2(t_1, t_2)\theta^2(t_1, t_2)}{g^2(t_1, t_2)\psi(t_1, t_2)} \mu(dt_1, dt_2).$$

The equality is obtained when

$$\frac{r(t_1, t_2)\theta(t_1, t_2)}{g(t_1, t_2)} = \text{constant} \times \psi(t_1, t_2). \tag{S2}$$

If  $\theta_2$  and  $\theta_1$  are fixed, we can use this relationship to find the best weights  $g_2$  and  $g_1$ . On the contrary, if  $g_2$  and  $g_1$  are fixed, one may find  $\theta_2$  and  $\theta_1$  and the corresponding contiguous alternatives under which the weighted win-loss statistic is optimal. In particular, if  $\theta_2(t_2)$  is a constant so the proportional hazards assumption holds for the terminal event, one may choose  $g_2 = r_2$  to maximize the power, in which case, log-rank test statistic is used for the terminal event. However, in the presence of related non-terminal event, this solution is not unique. For example, if  $g_2 = r_2$  and  $g_1 = r_1$ , we have

$\theta_2(t_2) = \text{constant}$  and  $\theta_1(t_1, t_2) = \text{constant} \times \psi_1(t_1, t_2)$ , but since we can also write

$$\text{var}\{n^{-3/2}W_D(G_1, G_2)\} = \int_{t_2 \leq \tau} \psi_2(t_2)\mu_2(dt_2) + \int_{t_2 \leq \tau} \tilde{\psi}_2(t_2)\mu_2(dt_2)$$

where  $\tilde{\psi}_2(t_2) = \int_{t_1 \leq t_2} \frac{\psi_1(t_1, t_2)\mu_1(dt_1, dt_2)}{\mu_2(dt_2)}$ , then  $\theta_2(t_2) = \text{constant} \times \{1 + \tilde{\psi}_2(t_2)\}$  and  $\theta_1(t_1, t_2) = 0$  is also a solution. Please note that in this case, the maximum obtainable power is not changed but the ways of achieving it are not unique. Furthermore, because  $r\theta/g \geq r_2\theta_2/g_2$ , the weighted win difference has a better efficiency than the weighted log-rank statistic based on the terminal event only.

To assume that  $\lambda_1(t_1 | t_2)$  is a nonincreasing function of  $t_2$  for any given  $t_1$ , we actually assume that for any  $t_1 \leq t_2$ ,

$$\frac{\text{pr}(T_2 = t_2, T_1 = t_1)}{\text{pr}(T_2 \geq t_2, T_1 = t_1)} \geq \frac{\text{pr}(T_2 = t_2, T_1 \geq t_1)}{\text{pr}(T_2 \geq t_2, T_1 \geq t_1)} \quad (\text{S3})$$

which is satisfied if for all  $t_1 \leq \min(t'_1, t_2)$

$$\frac{\text{pr}(T_2 = t_2, T_1 = t_1)}{\text{pr}(T_2 \geq t_2, T_1 = t_1)} \geq \frac{\text{pr}(T_2 = t_2, T_1 = t'_1)}{\text{pr}(T_2 \geq t_2, T_1 = t'_1)}.$$

Apparently, if the condition (S3) is satisfied, then under the contiguous alternatives, the weighted win difference will have a better power than the weighted log-rank statistic for the terminal event, provided that the weight function for the nonterminal event is suitably selected. This makes sense as when the nonterminal event and terminal event are positively correlated satisfying the condition (S3), the inclusion of the nonterminal event can improve the efficiency of the marginal analysis of the terminal event.

It remains to find the variance of  $W_D(g_1, g_2)$  under  $H_0$  in (S1). To do so, we find

$$\begin{aligned} & E\left\{\frac{(Z_i - Z_j)(L_{2ij} - W_{2ij})}{g_2(Y_{2i} \wedge Y_{2j})} \middle| O_i\right\} \\ &= \frac{\delta_{2i}r_2(Y_{2i})}{g_2(Y_{2i})} \left\{Z_i - \frac{r_{21}(Y_{2i})}{r_2(Y_{2i})}\right\} - \int \frac{r_2(t_2)}{g_2(t_2)} \left\{Z_i - \frac{r_{21}(t_2)}{r_2(t_2)}\right\} I(Y_{2i} \geq t_2)\lambda_2(t_2)dt_2 \\ &= B_{11i} - B_{12i}, \quad \text{say.} \end{aligned}$$

and

$$\begin{aligned} & E\left\{\frac{(Z_i - Z_j)\Omega_{2ij}(L_{1ij} - W_{1ij})}{g_1(Y_{1i} \wedge Y_{1j}, Y_{2i} \wedge Y_{2j})} \middle| O_i\right\} \\ &= \frac{\delta_{1i}(1 - \delta_{2i})r_1(Y_{1i}, Y_{2i})}{g_1(Y_{1i}, Y_{2i})} \left\{Z_i - \frac{r_{11}(Y_{1i}, Y_{2i})}{r_1(Y_{1i}, Y_{2i})}\right\} \\ &\quad - (1 - \delta_{2i}) \int \frac{r_1(t_1, Y_{2i})}{g_1(t_1, Y_{2i})} \left\{Z_i - \frac{r_{11}(t_1, Y_{2i})}{r_1(t_1, Y_{2i})}\right\} I(Y_{1i} \geq t_1)\lambda_1(t_1 | Y_{2i})dt_1 \\ &\quad + \delta_{1i} \int \frac{r_1(Y_{1i}, t_2)}{g_1(Y_{1i}, t_2)} I(Y_{2i} > t_2 \geq Y_{1i})Q_i(Y_{1i}, dt_2) \\ &\quad - \int_{t_1 \leq t_2} \frac{r_1(t_1, t_2)}{g_1(t_1, t_2)} I(Y_{1i} \geq t_1, Y_{2i} > t_2)Q_i(t_1, dt_2)\lambda_1(t_1 | t_2)dt_1 \\ &= B_{21i} - B_{22i} + B_{31i} - B_{32i}, \quad \text{say,} \end{aligned}$$

where, for  $i = 1, \dots, n$ ,

$$Q_i(t_1, t_2) = \int_{t_1 \leq s \leq t_2} \frac{Z_i r_{10}(t_1, s)\Lambda_{c0}(ds) - (1 - Z_i)r_{11}(t_1, s)\Lambda_{c1}(ds)}{r_1(t_1, s)}.$$

We need to compute  $E\{(B_{11i} - B_{12i} + B_{21i} - B_{22i} + B_{31i} - B_{32i})^2\}$ . By definition, we have  $E\{(B_{11i} - B_{12i})(B_{21i} - B_{22i})\} = 0$ . We calculate

$$\begin{aligned}
 E\{(B_{11i} - B_{12i})^2\} &= \int_{t_2 \leq \tau} \frac{r_2^2(t_2)}{g_2^2(t_2)} \mu_2(dt_2), \\
 E\{(B_{21i} - B_{22i} + B_{31i} - B_{32i})^2\} &= \int_{t_1 \leq t_2 \leq \tau} \frac{r_1^2(t_1, t_2)}{g_1^2(t_1, t_2)} \left\{ 1 + \tilde{\Lambda}_c(dt_2) - \frac{\tilde{\Lambda}_c(dt_2)}{\Lambda_a(dt_2)} \right\} \mu_1(dt_1, dt_2) \\
 &\quad + 2 \int_{t_1 \leq t'_2 < t_2 \leq \tau} \frac{r_1(t_1, t_2)}{g_1(t_1, t_2)} \frac{r_1(t_1, t'_2)}{g_1(t_1, t'_2)} \tilde{\Lambda}_c(dt'_2) \mu_1(dt_1, dt_2) \\
 &\quad + 2 \int_{t_1 \leq t_2 \leq \tau} \left\{ \int_{t'_1 \leq t_1} \frac{r_1(t'_1, t_2)}{g_1(t'_1, t_2)} \lambda_1(t'_1 | t_2) dt'_1 \right\} \eta_{g_1}(t_1, t_2) \mu_1(dt_1, dt_2) \\
 2E\{(B_{11i} - B_{12i})(B_{31i} - B_{32i})\} &= 2 \int_{t_1 \leq t_2 < \tau} \frac{r_2(t_2)}{g_2(t_2)} \xi_{g_2}(t_2) \eta_{g_1}(t_1, t_2) \mu_1(dt_1, dt_2).
 \end{aligned}$$

## References

1. Giné E, Latała R, Zinn J. Exponential and moment inequalities for U-statistics. *High Dimensional Probability II. Progress in Probability* 2000; **47**: 13–38.
2. Houdré C, Reynaud-Bouret P. Exponential Inequalities, with Constants, for U-statistics of Order Two. *Stochastic inequalities and applications. Progress in Probability* 2003; **56**: 55–69.
3. Hájek J. Asymptotic normality of simple linear rank statistics under alternatives. *Ann. Math. Statist.* 1968; **39**: 325–346.
